# Supplementary material for: The Genetic Diversity of Mink (Neovison vison) Populations in China
Source: MDPI journal article supplement (doi:10.3390/ani13091497), 2023-04-27
Supplement: s1 [file s1]

## Article

# The Genetic Diversity of Mink (*Neovison vison*) Populations in China

Tietao Zhang, Hu Li, Peter Forge Larsen, Hengxing Ba, Hongyu Shi, Haihua Zhang and Zongyue Liu

**Table S1.** List of quality filtering of reads on 97 American mink genomes.

| Sample | HQ_Reads | HQ_Reads (%) | HQ_Data(bp) | HQ_Data (%) |
|--------|----------|--------------|-------------|-------------|
| BLM1   | 27590406 | 95.62        | 3866732627  | 94.37       |
| BLM3   | 27963750 | 95.5         | 3917848859  | 94.23       |
| BLM4   | 28079484 | 63.99        | 3933245118  | 63.17       |
| BLM6   | 37283864 | 94.97        | 5210163878  | 93.52       |
| BLM8   | 27639292 | 95.45        | 3870846532  | 94.15       |
| BLM10  | 29227434 | 78.7         | 4092900125  | 77.86       |
| BLM11  | 29162680 | 95.19        | 4083851342  | 93.88       |
| BLM12  | 35011814 | 95.45        | 4885007444  | 94.13       |
| BLM13  | 27637878 | 95.5         | 3871742031  | 94.22       |
| BLM14  | 31626634 | 95.83        | 4433900435  | 94.56       |
| BLM15  | 28658734 | 94.83        | 4008655686  | 93.41       |
| BLM21  | 35305254 | 95.49        | 4945124564  | 94.18       |
| BLM22  | 30344232 | 95.89        | 4254427172  | 94.71       |
| BLM23  | 29767944 | 96.61        | 4179745583  | 95.55       |
| BLM24  | 16450848 | 94.55        | 2294882393  | 92.86       |
| A01    | 15452570 | 95.06        | 2157501060  | 93.45       |
| A31    | 29684046 | 95.56        | 4158119489  | 94.29       |
| A28    | 27543006 | 95.75        | 3860170181  | 94.52       |
| A29    | 28205558 | 95.82        | 3952757584  | 94.59       |
| A505   | 30945558 | 95.38        | 4333608947  | 94.09       |
| A506   | 29625876 | 95.38        | 4149659124  | 94.1        |
| A504   | 30618962 | 95.93        | 4292737260  | 94.73       |
| A539   | 20304554 | 95.4         | 2845279851  | 94.17       |
| A509   | 22007740 | 95.4         | 3083798181  | 94.16       |
| A511   | 22636244 | 95.29        | 3171022699  | 94.03       |
| A517   | 21880776 | 94.89        | 3062373030  | 93.55       |
| A519   | 22258602 | 95.43        | 3118709545  | 94.18       |
| B209   | 20474692 | 95.05        | 2867416326  | 93.77       |
| B210   | 21969328 | 94.97        | 3076181441  | 93.67       |
| B211   | 20248638 | 95.09        | 2835150298  | 93.78       |
| Y1     | 24813900 | 95.69        | 3479233033  | 94.51       |
| Y2     | 24905734 | 95.99        | 3494462757  | 94.87       |
| Y3     | 23224870 | 96           | 3258540819  | 94.88       |
| Y7     | 25443648 | 95.8         | 3568174101  | 94.63       |
| Y8     | 26179448 | 95.96        | 3672419548  | 94.82       |
| Y9     | 24836028 | 95.84        | 3483845303  | 94.7        |
| Y10    | 28179248 | 95.82        | 3952711216  | 94.67       |
| RM43   | 25271742 | 93.95        | 3533302975  | 92.41       |
| RM45   | 24951458 | 94.74        | 3489924760  | 93.37       |
| RM52   | 25630462 | 94.69        | 3584218161  | 93.31       |

|       |          |       |            |       |
|-------|----------|-------|------------|-------|
| RM4   | 24318668 | 95.22 | 3404470828 | 93.93 |
| RM9   | 23140928 | 95.01 | 3238381262 | 93.68 |
| RM10  | 24372992 | 95.02 | 3410480143 | 93.69 |
| K1    | 23543102 | 94.1  | 3288035049 | 92.61 |
| K6    | 25303048 | 94.37 | 3536306806 | 92.94 |
| K7    | 24708948 | 94.47 | 3452788353 | 93.02 |
| K8    | 24354604 | 94.81 | 3406811760 | 93.45 |
| K10   | 25920758 | 95.02 | 3627582936 | 93.7  |
| A5404 | 28361638 | 94.81 | 3967045289 | 93.45 |
| A5372 | 25212842 | 95.12 | 3529118817 | 93.82 |
| A5361 | 25009122 | 94.6  | 3495729259 | 93.18 |
| A5263 | 25397482 | 94.88 | 3552473079 | 93.52 |
| A5240 | 23223132 | 94.44 | 3245694085 | 93    |
| A5392 | 23424444 | 95.66 | 3282282045 | 94.45 |
| A5237 | 21090448 | 95.71 | 2955336988 | 94.51 |
| A5232 | 20285326 | 95.79 | 2842769017 | 94.59 |
| A5149 | 22306176 | 95.86 | 3126840811 | 94.68 |
| A5222 | 21198950 | 96.01 | 2972346569 | 94.86 |
| A5257 | 22117806 | 95.88 | 3100829161 | 94.71 |
| A5266 | 23002176 | 96.19 | 3226855459 | 95.09 |
| A5279 | 27350118 | 96.12 | 3835225540 | 94.97 |
| B2205 | 22636152 | 95.72 | 3171182749 | 94.48 |
| B2206 | 27044368 | 93.85 | 3778886538 | 92.37 |
| B2141 | 26858530 | 93.95 | 3753963785 | 92.5  |
| B2224 | 26970998 | 93.85 | 3767371938 | 92.34 |
| B2258 | 28427676 | 92.92 | 3963455662 | 91.25 |
| B2259 | 27548820 | 93.32 | 3845341922 | 91.75 |
| B2282 | 27817006 | 95.11 | 3895511099 | 93.82 |
| B2122 | 30071908 | 92.99 | 4194818642 | 91.36 |
| B2120 | 25854844 | 93.6  | 3610257712 | 92.06 |
| B2119 | 30619896 | 95.17 | 4288973436 | 93.9  |
| B2108 | 27506062 | 94.4  | 3847149122 | 93    |
| B2104 | 28578490 | 94.89 | 4000935539 | 93.57 |
| B2100 | 29331928 | 95.75 | 4113949435 | 94.59 |
| B2304 | 28701638 | 95.37 | 4022319464 | 94.14 |
| K30   | 29879272 | 94.58 | 4182553297 | 93.25 |
| K60   | 31076126 | 93.94 | 4344332976 | 92.48 |
| K70   | 30401322 | 94.68 | 4256970520 | 93.37 |
| K80   | 28968120 | 95.52 | 4062218928 | 94.34 |
| K90   | 27810138 | 95.18 | 3897824005 | 93.95 |
| K100  | 32590676 | 94.62 | 4561224353 | 93.27 |
| Y40   | 28909758 | 95.31 | 4051787651 | 94.08 |
| Y70   | 28419412 | 95.91 | 3987707730 | 94.79 |
| Y80   | 28017408 | 95.2  | 3927768635 | 94    |
| Y90   | 28326508 | 95.85 | 3974572117 | 94.74 |
| Y100  | 26222306 | 95.7  | 3678741396 | 94.56 |
| H1    | 35170182 | 94.37 | 4918846973 | 92.98 |
| H2    | 30831362 | 94.26 | 4311657684 | 92.87 |
| H3    | 29868156 | 94.41 | 4177401525 | 93.03 |
| H5    | 29095292 | 94.42 | 4069469186 | 93.04 |
| H7    | 27872206 | 94.53 | 3899725297 | 93.18 |

|         |            |        |              |         |
|---------|------------|--------|--------------|---------|
| H8      | 28278582   | 93.97  | 3951918863   | 92.52   |
| H9      | 31392950   | 94     | 4387211644   | 92.55   |
| H10     | 28355530   | 94.07  | 3963750384   | 92.65   |
| H11     | 26383146   | 93     | 3679922517   | 91.38   |
| H12     | 25849770   | 92.99  | 3605822062   | 91.39   |
| B272    | 26190554   | 93.15  | 3653580604   | 91.54   |
| total   | 2590562736 | 9168.9 | 362626920124 | 9040.99 |
| average | 26706832.3 | 94.52  | 3738421857   | 93.21   |

Note: HQ Reads: High-quality reads number; HQ Data (bp): Number of high-quality reads-bases; HQ Reads (%): the percentage of high-quality reads to the lower machine reads; HQ Data (%): the percentage of high-quality sequence bases in the lower machine base.

**Table S2.** List of sequencing data alignment on 97 American mink genomes.

| Sample | Total_reads | Mapped_reads | Mapping_rate |
|--------|-------------|--------------|--------------|
| BLM12  | 35336875    | 34944831     | 98.89        |
| Y2     | 25129808    | 24884571     | 99.02        |
| BLM15  | 28907080    | 28581309     | 98.87        |
| B211   | 20448011    | 20217953     | 98.87        |
| A5361  | 25265557    | 24986908     | 98.90        |
| RM4    | 24561842    | 24291532     | 98.90        |
| B2108  | 27749846    | 27445184     | 98.90        |
| A29    | 28485078    | 28162404     | 98.87        |
| Y10    | 28463217    | 28111895     | 98.77        |
| B2258  | 28674855    | 28361800     | 98.91        |
| K100   | 32873244    | 32507394     | 98.89        |
| A511   | 22856562    | 22586693     | 98.82        |
| B2205  | 22868735    | 22602074     | 98.83        |
| A5266  | 23219924    | 22987797     | 99.00        |
| BLM1   | 27832357    | 27523364     | 98.89        |
| H3     | 30115843    | 29774709     | 98.87        |
| A5232  | 20484591    | 20263633     | 98.92        |
| H11    | 26611644    | 26307713     | 98.86        |
| A5222  | 21395934    | 21163447     | 98.91        |
| BLM6   | 37678530    | 37238528     | 98.83        |
| BLM8   | 27883821    | 27534043     | 98.75        |
| BLM22  | 30630061    | 30267088     | 98.81        |
| B272   | 26407392    | 26108788     | 98.87        |
| A506   | 29906386    | 29586688     | 98.93        |
| K90    | 28054764    | 27764058     | 98.96        |
| H9     | 31674155    | 31302277     | 98.83        |
| B2122  | 30354753    | 29992781     | 98.81        |
| B2206  | 27286265    | 27004619     | 98.97        |
| K80    | 29227174    | 28874438     | 98.79        |
| H7     | 28116024    | 27787353     | 98.83        |
| A5404  | 28627162    | 28309599     | 98.89        |
| BLM21  | 35637368    | 35228765     | 98.85        |
| H12    | 26061893    | 25763455     | 98.85        |
| A505   | 31243679    | 30891463     | 98.87        |
| Y70    | 28665863    | 28347325     | 98.89        |
| Y8     | 26418811    | 26134366     | 98.92        |
| K7     | 24965526    | 24664905     | 98.80        |

|       |          |          |       |
|-------|----------|----------|-------|
| A5372 | 25451466 | 25197294 | 99.00 |
| Y1    | 25053309 | 24801786 | 99.00 |
| RM45  | 25201782 | 24908925 | 98.84 |
| Y100  | 26469724 | 26137970 | 98.75 |
| Y40   | 29152322 | 28317839 | 97.14 |
| RM9   | 23370061 | 23084975 | 98.78 |
| RM52  | 25880556 | 25579951 | 98.84 |
| B2141 | 27109192 | 26830083 | 98.97 |
| BLM11 | 29425631 | 29071386 | 98.80 |
| B2304 | 28986079 | 28654337 | 98.86 |
| BLM13 | 27894669 | 27563988 | 98.81 |
| A5392 | 23644017 | 23399801 | 98.97 |
| B2224 | 27208476 | 26888278 | 98.82 |
| B2119 | 30894208 | 30558347 | 98.91 |
| B2100 | 29615825 | 29292721 | 98.91 |
| B2282 | 28080585 | 27774269 | 98.91 |
| A31   | 29973942 | 29632966 | 98.86 |
| B210  | 22175455 | 21927918 | 98.88 |
| BLM14 | 31960601 | 31565441 | 98.76 |
| A28   | 27814732 | 27493796 | 98.85 |
| B209  | 20675908 | 20451608 | 98.92 |
| A5257 | 22320279 | 22068241 | 98.87 |
| A5240 | 23451287 | 23217687 | 99.00 |
| Y3    | 23453866 | 23223331 | 99.02 |
| A539  | 20503183 | 20278578 | 98.90 |
| H2    | 31094699 | 30746301 | 98.88 |
| BLM23 | 30062916 | 29706069 | 98.81 |
| H5    | 29344893 | 29011023 | 98.86 |
| K60   | 31350809 | 30990645 | 98.85 |
| K70   | 30676227 | 30175133 | 98.37 |
| B2120 | 26091672 | 25833117 | 99.01 |
| Y80   | 28242857 | 27921913 | 98.86 |
| B2259 | 27785558 | 27494880 | 98.95 |
| H10   | 28595936 | 28277020 | 98.88 |
| Y90   | 28573569 | 28272409 | 98.95 |
| BLM24 | 16585945 | 16413491 | 98.96 |
| A5279 | 27585206 | 27226811 | 98.70 |
| A517  | 22095355 | 21865369 | 98.96 |
| A519  | 22478774 | 22230946 | 98.90 |
| A509  | 22220172 | 21981493 | 98.93 |
| A01   | 15573858 | 15404246 | 98.91 |
| B2104 | 28833372 | 28553225 | 99.03 |
| K6    | 25551825 | 25272200 | 98.91 |
| BLM10 | 29472041 | 29135876 | 98.86 |
| RM43  | 25515200 | 25217951 | 98.84 |
| Y9    | 25075264 | 24794248 | 98.88 |
| K8    | 24585870 | 24320883 | 98.92 |
| RM10  | 24610027 | 24311873 | 98.79 |
| K10   | 26168459 | 25876138 | 98.88 |
| Y7    | 25688454 | 25417648 | 98.95 |
| K1    | 23773464 | 23498601 | 98.84 |

|                             |          |          |       |
|-----------------------------|----------|----------|-------|
| H1                          | 35465506 | 35069621 | 98.88 |
| K30                         | 30147496 | 29800829 | 98.85 |
| BLM3                        | 28221006 | 27864912 | 98.74 |
| H8                          | 28515363 | 28192581 | 98.87 |
| A504                        | 30908395 | 30578982 | 98.93 |
| BLM4                        | 28336316 | 27999093 | 98.81 |
| A5263                       | 25646482 | 25359329 | 98.88 |
| A5237                       | 21291742 | 21099056 | 99.10 |
| A5149                       | 22518415 | 22294881 | 99.01 |
| The average of Mapping_rate |          |          | 98.86 |

Note: Total Reads: total number of sequences; Mapped reads: number of sequences that can be aligned to the reference genome; Mapping Rate (%): the proportion of the number of sequences aligned to the reference genome to the total number of sequences

**Table S3.** List of sequencing data quality on 97 American mink genomes.

| Sample | Reads_Num | Total_Bases(bp) | GC(%) | Q20(%) | Q30(%) |
|--------|-----------|-----------------|-------|--------|--------|
| BLM1   | 28855216  | 4097235140      | 51.83 | 97.37  | 93.28  |
| BLM3   | 29280492  | 4157644666      | 51.77 | 97.3   | 93.14  |
| BLM4   | 43878624  | 6226785807      | 50.07 | 97.15  | 92.69  |
| BLM6   | 39257662  | 5571005674      | 50.38 | 97.05  | 92.56  |
| BLM8   | 28956410  | 4111512661      | 52.26 | 97.27  | 93.08  |
| BLM10  | 37136316  | 5256986097      | 50.91 | 97.21  | 92.87  |
| BLM11  | 30636492  | 4350156081      | 51.98 | 97.18  | 92.89  |
| BLM12  | 36679392  | 5189725117      | 49.89 | 97.24  | 92.89  |
| BLM13  | 28941290  | 4109396396      | 51.13 | 97.32  | 93.16  |
| BLM14  | 33003692  | 4688777519      | 51.88 | 97.44  | 93.44  |
| BLM15  | 30220778  | 4291324836      | 51.47 | 97.04  | 92.64  |
| BLM21  | 36972422  | 5250832024      | 50.52 | 97.28  | 93.04  |
| BLM22  | 31643330  | 4492248813      | 51.33 | 97.61  | 93.93  |
| BLM23  | 30813638  | 4374493601      | 51.82 | 97.9   | 94.5   |
| BLM24  | 17399208  | 2471367137      | 50.79 | 96.76  | 91.83  |
| A01    | 16254954  | 2308749042      | 51.18 | 96.95  | 92.24  |
| A31    | 31064334  | 4410134399      | 51.18 | 97.48  | 93.68  |
| A28    | 28766298  | 4083870717      | 51.18 | 97.56  | 93.83  |
| A29    | 29435036  | 4178781732      | 51.13 | 97.56  | 93.82  |
| A505   | 32443674  | 4605931532      | 51.18 | 97.41  | 93.54  |
| A506   | 31062252  | 4409976243      | 51.25 | 97.41  | 93.53  |
| A504   | 31918984  | 4531472642      | 51.44 | 97.63  | 93.96  |
| A539   | 21282866  | 3021455183      | 51.87 | 97.49  | 93.74  |
| A509   | 23069676  | 3275093250      | 51.81 | 97.48  | 93.7   |
| A511   | 23755242  | 3372427321      | 51.56 | 97.43  | 93.62  |
| A517   | 23058278  | 3273462269      | 51.23 | 97.27  | 93.31  |
| A519   | 23325012  | 3311330288      | 51.73 | 97.47  | 93.68  |
| B209   | 21540192  | 3057980354      | 51.61 | 97.35  | 93.47  |
| B210   | 23131910  | 3284023720      | 51.63 | 97.31  | 93.38  |
| B211   | 21294568  | 3023125749      | 51.43 | 97.35  | 93.46  |
| Y1     | 25932132  | 3681468998      | 51.68 | 97.58  | 93.88  |
| Y2     | 25946120  | 3683462941      | 52.1  | 97.7   | 94.12  |
| Y3     | 24192164  | 3434455148      | 52.21 | 97.71  | 94.14  |
| Y7     | 26559198  | 3770508878      | 51.86 | 97.62  | 93.98  |
| Y8     | 27281850  | 3873090528      | 52.83 | 97.68  | 94.08  |

|       |          |            |       |       |       |
|-------|----------|------------|-------|-------|-------|
| Y9    | 25913406 | 3678813920 | 52.22 | 97.65 | 94.02 |
| Y10   | 29409328 | 4175276842 | 52.17 | 97.64 | 93.99 |
| RM43  | 26898702 | 3823378977 | 52.21 | 96.89 | 92.55 |
| RM45  | 26337062 | 3737736140 | 51.61 | 97.19 | 93.07 |
| RM52  | 27066360 | 3841248111 | 51.75 | 97.15 | 92.98 |
| RM4   | 25539242 | 3624477802 | 52.94 | 97.38 | 93.48 |
| RM9   | 24357136 | 3456716522 | 51.7  | 97.28 | 93.25 |
| RM10  | 25650428 | 3640227718 | 53.25 | 97.29 | 93.31 |
| K1    | 25018070 | 3550488197 | 51.53 | 96.93 | 92.57 |
| K6    | 26811192 | 3805054705 | 51.55 | 97.03 | 92.76 |
| K7    | 26156720 | 3712044624 | 51.73 | 97.06 | 92.84 |
| K8    | 25689020 | 3645610565 | 51.35 | 97.22 | 93.16 |
| K10   | 27280696 | 3871456999 | 52.07 | 97.29 | 93.27 |
| A5404 | 29913796 | 4245102619 | 52.17 | 97.22 | 93.18 |
| A5372 | 26505404 | 3761427947 | 51.96 | 97.35 | 93.42 |
| A5361 | 26436208 | 3751586187 | 51.73 | 97.11 | 92.96 |
| A5263 | 26768642 | 3798768950 | 52.25 | 97.24 | 93.24 |
| A5240 | 24591600 | 3489957564 | 51.48 | 97.07 | 92.9  |
| A5392 | 24487284 | 3475047659 | 52.51 | 97.56 | 93.87 |
| A5237 | 22035332 | 3127106929 | 52.12 | 97.6  | 93.98 |
| A5232 | 21177968 | 3005405833 | 52.44 | 97.62 | 94    |
| A5149 | 23270430 | 3302402516 | 51.75 | 97.65 | 94.04 |
| A5222 | 22079778 | 3133438993 | 52.42 | 97.71 | 94.19 |
| A5257 | 23069146 | 3273890199 | 52.81 | 97.67 | 94.12 |
| A5266 | 23912468 | 3393603378 | 52.01 | 97.8  | 94.35 |
| A5279 | 28455598 | 4038483349 | 54.95 | 97.76 | 94.38 |
| B2205 | 23649118 | 3356347999 | 52.74 | 97.59 | 93.99 |
| B2206 | 28816298 | 4091021618 | 51.6  | 96.87 | 92.48 |
| B2141 | 28587138 | 4058519094 | 51.49 | 96.91 | 92.58 |
| B2224 | 28739000 | 4080032763 | 52.34 | 96.86 | 92.45 |
| B2258 | 30593184 | 4343297433 | 52.91 | 96.54 | 91.89 |
| B2259 | 29521714 | 4191139597 | 51.71 | 96.67 | 92.09 |
| B2282 | 29246784 | 4152102152 | 52.88 | 97.34 | 93.42 |
| B2122 | 32339300 | 4591332762 | 51.36 | 96.53 | 91.84 |
| B2120 | 27621686 | 3921533806 | 51.46 | 96.78 | 92.32 |
| B2119 | 32174332 | 4567807764 | 52.53 | 97.38 | 93.4  |
| B2108 | 29136572 | 4136528324 | 52.19 | 97.07 | 92.77 |
| B2104 | 30117018 | 4275907783 | 51.69 | 97.25 | 93.1  |
| B2100 | 30634128 | 4349182310 | 51.37 | 97.6  | 93.82 |
| B2304 | 30095866 | 4272925541 | 51.69 | 97.46 | 93.57 |
| K30   | 31590976 | 4485493907 | 51.21 | 97.17 | 92.98 |
| K60   | 33082148 | 4697407870 | 51.15 | 96.91 | 92.47 |
| K70   | 32108514 | 4559102032 | 51.41 | 97.22 | 93.09 |
| K80   | 30327720 | 4305873537 | 52.32 | 97.54 | 93.74 |
| K90   | 29219880 | 4148824108 | 51.98 | 97.4  | 93.44 |
| K100  | 34442404 | 4890333372 | 51.49 | 97.17 | 92.97 |
| Y40   | 30333014 | 4306941029 | 53.75 | 97.44 | 93.59 |
| Y70   | 29632550 | 4206716388 | 51.73 | 97.65 | 93.89 |
| Y80   | 29428702 | 4178327573 | 51.79 | 97.42 | 93.47 |
| Y90   | 29551662 | 4195196725 | 51.63 | 97.66 | 93.92 |
| Y100  | 27401136 | 3890357158 | 52.12 | 97.62 | 93.89 |

|         |            |              |       |         |         |
|---------|------------|--------------|-------|---------|---------|
| H1      | 37268910   | 5290028083   | 51.95 | 97.05   | 92.64   |
| H2      | 32709550   | 4642766024   | 51.51 | 97.01   | 92.57   |
| H3      | 31635972   | 4490335224   | 51.59 | 97.04   | 92.59   |
| H5      | 30813290   | 4373711906   | 51.64 | 97.07   | 92.71   |
| H7      | 29484462   | 4184994827   | 51.95 | 97.11   | 92.79   |
| H8      | 30091952   | 4271214509   | 51.38 | 96.88   | 92.3    |
| H9      | 33395528   | 4740481024   | 51.95 | 96.9    | 92.4    |
| H10     | 30141820   | 4278385163   | 51.41 | 96.93   | 92.4    |
| H11     | 28370488   | 4026929699   | 51.29 | 96.54   | 91.8    |
| H12     | 27797616   | 3945633143   | 51.52 | 96.54   | 91.81   |
| B272    | 28117476   | 3991042099   | 52.77 | 96.59   | 91.93   |
| total   | 2748038626 | 390076820094 | 5024  | 9435.63 | 9042.09 |
| average | 28330295   | 4021410516   | 51.79 | 97.27   | 93.21   |

Note: Q20: the percentage of bases with a Phred value greater than 20 to the total bases; Q30: the percentage of bases with a Phred value greater than 30 to the total bases; GC(%): the percentage of G and C of the four bases in clean reads

**Table S4.** Indel test result statistics.

| Sample | HOM_REF | HET   | UNKNOWN | HOM_ALT |
|--------|---------|-------|---------|---------|
| A01    | 59409   | 16791 | 107969  | 21564   |
| A28    | 62048   | 17511 | 104362  | 21812   |
| A29    | 61872   | 16866 | 104703  | 22292   |
| A31    | 62473   | 17653 | 103315  | 22292   |
| A504   | 64240   | 17315 | 100827  | 23351   |
| A505   | 63010   | 18103 | 101548  | 23072   |
| A506   | 63510   | 17114 | 102224  | 22885   |
| A509   | 65709   | 17449 | 99036   | 23539   |
| A511   | 65802   | 17681 | 98250   | 24000   |
| A5149  | 65202   | 17153 | 99955   | 23423   |
| A517   | 61895   | 16544 | 104872  | 22422   |
| A519   | 65278   | 16552 | 100289  | 23614   |
| A5222  | 68834   | 19170 | 92405   | 25324   |
| A5232  | 63156   | 16087 | 104556  | 21934   |
| A5237  | 63541   | 17081 | 102727  | 22384   |
| A5240  | 62187   | 17713 | 103737  | 22096   |
| A5257  | 70416   | 18684 | 90669   | 25964   |
| A5263  | 63828   | 16982 | 102290  | 22633   |
| A5266  | 59187   | 22244 | 103646  | 20656   |
| A5279  | 62770   | 33169 | 87135   | 22659   |
| A5361  | 62613   | 17867 | 102394  | 22859   |
| A5372  | 69148   | 18400 | 93203   | 24982   |
| A539   | 66797   | 17519 | 97175   | 24242   |
| A5392  | 68277   | 18318 | 94669   | 24469   |
| A5404  | 70387   | 21187 | 89123   | 25036   |
| B209   | 64372   | 16836 | 101785  | 22740   |
| B210   | 66999   | 18482 | 96477   | 23775   |
| B2100  | 66388   | 18193 | 97087   | 24065   |
| B2104  | 74755   | 20975 | 82756   | 27247   |
| B2108  | 74458   | 23409 | 79792   | 28074   |
| B211   | 63440   | 16692 | 103164  | 22437   |
| B2119  | 75191   | 22639 | 78933   | 28970   |

---

|       |       |       |        |       |
|-------|-------|-------|--------|-------|
| B2120 | 70136 | 20494 | 89710  | 25393 |
| B2122 | 67130 | 19253 | 94627  | 24723 |
| B2141 | 65446 | 19150 | 98104  | 23033 |
| B2205 | 64021 | 17045 | 101826 | 22841 |
| B2206 | 71677 | 21093 | 86426  | 26537 |
| B2224 | 73505 | 23223 | 81477  | 27528 |
| B2258 | 75304 | 25775 | 75843  | 28811 |
| B2259 | 71409 | 21703 | 86050  | 26571 |
| B2282 | 69655 | 20085 | 90789  | 25204 |
| B2304 | 65538 | 18263 | 98085  | 23847 |
| B272  | 74114 | 24628 | 78868  | 28123 |
| BLM1  | 69541 | 20411 | 90223  | 25558 |
| BLM10 | 71946 | 23250 | 83644  | 26893 |
| BLM11 | 71476 | 20454 | 87355  | 26448 |
| BLM12 | 69170 | 26240 | 77364  | 32959 |
| BLM13 | 65680 | 17746 | 98410  | 23897 |
| BLM14 | 70981 | 26891 | 75213  | 32648 |
| BLM15 | 69431 | 21621 | 89494  | 25187 |
| BLM21 | 73518 | 27544 | 70063  | 34608 |
| BLM22 | 65728 | 18607 | 98255  | 23143 |
| BLM23 | 66544 | 17302 | 98643  | 23244 |
| BLM24 | 59320 | 16517 | 108905 | 20991 |
| BLM3  | 69739 | 20481 | 90075  | 25438 |
| BLM4  | 69383 | 20502 | 90481  | 25367 |
| BLM6  | 70788 | 28768 | 70612  | 35565 |
| BLM8  | 71554 | 21872 | 86181  | 26126 |
| H1    | 73034 | 24157 | 80219  | 28323 |
| H10   | 69464 | 21513 | 88489  | 26267 |
| H11   | 66014 | 20047 | 94629  | 25043 |
| H12   | 69931 | 21876 | 87094  | 26832 |
| H2    | 70285 | 22278 | 86391  | 26779 |
| H3    | 70988 | 22329 | 85204  | 27212 |
| H5    | 72094 | 22742 | 83201  | 27696 |
| H7    | 72172 | 22138 | 83497  | 27926 |
| H8    | 70506 | 22209 | 85791  | 27227 |
| H9    | 71828 | 23064 | 83268  | 27573 |
| K1    | 66561 | 17920 | 97470  | 23782 |
| K10   | 70755 | 20493 | 89251  | 25234 |
| K100  | 71989 | 23175 | 84254  | 26315 |
| K30   | 68736 | 20623 | 90982  | 25392 |
| K6    | 65822 | 18962 | 97596  | 23353 |
| K60   | 68752 | 21003 | 91275  | 24703 |
| K7    | 65960 | 18891 | 97650  | 23232 |
| K70   | 71487 | 22357 | 86205  | 25684 |
| K8    | 65467 | 18736 | 98221  | 23309 |
| K80   | 71288 | 20343 | 88226  | 25876 |
| K90   | 71312 | 20566 | 87934  | 25921 |
| RM10  | 72194 | 21875 | 84839  | 26825 |
| RM4   | 70601 | 21230 | 87871  | 26031 |
| RM43  | 70115 | 21505 | 87766  | 26347 |
| RM45  | 67719 | 19763 | 93984  | 24267 |

---



|      |       |       |        |       |
|------|-------|-------|--------|-------|
| RM52 | 68312 | 20078 | 92442  | 24901 |
| RM9  | 67941 | 19226 | 93930  | 24636 |
| Y1   | 63439 | 15829 | 104888 | 21577 |
| Y10  | 66573 | 17748 | 98836  | 22576 |
| Y100 | 68562 | 17639 | 95688  | 23844 |
| Y2   | 66880 | 16438 | 99362  | 23053 |
| Y3   | 64464 | 15982 | 103281 | 22006 |
| Y40  | 75533 | 25149 | 77117  | 27934 |
| Y7   | 65918 | 16700 | 100202 | 22913 |
| Y70  | 64369 | 16442 | 102335 | 22587 |
| Y8   | 69214 | 18507 | 93835  | 24177 |
| Y80  | 69781 | 18907 | 92632  | 24413 |
| Y9   | 67396 | 17143 | 98207  | 22987 |
| Y90  | 63833 | 15837 | 104070 | 21993 |

Note: HOM\_REF: the sample is homozygous reference; HET: the sample is heterozygous; UNKNOWN: the sample is genotype missing; HOM\_ALT: the sample is homozygous alternate.

**Table S5.** GO classification of the selected genes in BLM\_mink and SM mink.

| BLM        |                                                        |             | SM         |                                                                |             |
|------------|--------------------------------------------------------|-------------|------------|----------------------------------------------------------------|-------------|
| GO.ID      | Term                                                   | Pvalue      | GO.ID      | Term                                                           | Pvalue      |
| GO:0036452 | ESCRT complex                                          | 0.02628439  | GO:0042175 | nuclear outer membrane-endoplasmic reticulum membrane network  | 0.00012882  |
| GO:0031225 | anchored component of membrane                         | 0.029164258 | GO:0044432 | endoplasmic reticulum part                                     | 0.000147938 |
| GO:0010008 | endosome membrane                                      | 0.037755675 | GO:0031984 | organelle subcompartment                                       | 0.000203809 |
| GO:0005615 | extracellular space                                    | 0.042965728 | GO:0012505 | endomembrane system                                            | 0.0002707   |
| GO:0044440 | endosomal part                                         | 0.046275251 | GO:0005783 | endoplasmic reticulum                                          | 0.001466313 |
| GO:0030176 | integral component of endoplasmic reticulum membrane   | 0.065878048 | GO:0008021 | synaptic vesicle                                               | 0.003356567 |
| GO:0031227 | intrinsic component of endoplasmic reticulum membrane  | 0.065878048 | GO:0070382 | exocytic vesicle                                               | 0.003948276 |
| GO:0005768 | endosome                                               | 0.068647184 | GO:0098793 | presynapse                                                     | 0.009307329 |
| GO:0005085 | guanyl-nucleotide exchange factor activity             | 0.001366893 | GO:0016174 | NAD(P)H oxidase activity                                       | 4.29E-05    |
| GO:0019899 | enzyme binding                                         | 0.002416696 | GO:0050664 | oxidoreductase activity, acting on NAD(P)H, oxygen as acceptor | 0.000423097 |
| GO:0004340 | glucokinase activity                                   | 0.003623188 | GO:0001540 | amyloid-beta binding                                           | 0.000631932 |
| GO:0004801 | sedoheptulose-7-phosphate:D-glyceraldehyde-3-phosphate | 0.003623188 | GO:0004697 | protein kinase C activity                                      | 0.001169546 |

|            |                                                                   |             |            |                                                         |             |
|------------|-------------------------------------------------------------------|-------------|------------|---------------------------------------------------------|-------------|
|            | glyceronetransferase activity                                     |             |            |                                                         |             |
| GO:0016744 | transferase activity, transferring aldehyde or ketonic groups     | 0.003623188 | GO:0042277 | peptide binding                                         | 0.004256545 |
| GO:0035299 | inositol pentakisphosphate 2-kinase activity                      | 0.003623188 | GO:0005415 | nucleoside:sodium symporter activity                    | 0.006587615 |
| GO:0051020 | GTPase binding                                                    | 0.005792961 | GO:0010309 | acireductone dioxygenase [iron(II)-requiring] activity  | 0.006587615 |
| GO:0004967 | glucagon receptor activity                                        | 0.007233547 | GO:0004601 | peroxidase activity                                     | 0.009912783 |
| GO:0005152 | interleukin-1 receptor antagonist activity                        | 0.007233547 | GO:0004379 | glycylpeptide N-tetradecanoyltransferase activity       | 0.013132373 |
| GO:0008158 | hedgehog receptor activity                                        | 0.007233547 | GO:0008124 | 4-alpha-hydroxytetrahydrobiopterin dehydratase activity | 0.013132373 |
| GO:0000291 | nuclear-transcribed mRNA catabolic process, exonucleolytic        | 0.002904263 | GO:0017000 | antibiotic biosynthetic process                         | 6.80014E-05 |
| GO:0001960 | negative regulation of cytokine-mediated signaling pathway        | 0.002904263 | GO:0050665 | hydrogen peroxide biosynthetic process                  | 6.80014E-05 |
| GO:0034427 | nuclear-transcribed mRNA catabolic process, exonucleolytic, 3'-5' | 0.002904263 | GO:0042743 | hydrogen peroxide metabolic process                     | 0.000202904 |
| GO:0060761 | negative regulation of response to cytokine stimulus              | 0.002904263 | GO:0006979 | response to oxidative stress                            | 0.00172093  |
| GO:2000659 | regulation of interleukin-1-mediated signaling pathway            | 0.002904263 | GO:1903409 | reactive oxygen species biosynthetic process            | 0.001843324 |
| GO:2000660 | negative regulation of interleukin-1-mediated signaling pathway   | 0.002904263 | GO:0007268 | chemical synaptic transmission                          | 0.006462425 |
| GO:1901575 | organic substance catabolic process                               | 0.003751786 | GO:0098916 | anterograde trans-synaptic signaling                    | 0.006462425 |
| GO:0002793 | positive regulation of peptide secretion                          | 0.005800392 | GO:0099536 | synaptic signaling                                      | 0.006462425 |
| GO:0032024 | positive regulation of insulin secretion                          | 0.005800392 | GO:0099537 | trans-synaptic signaling                                | 0.006462425 |
| GO:0045766 | positive regulation of angiogenesis                               | 0.005800392 | GO:0072593 | reactive oxygen species metabolic process               | 0.007567269 |
| GO:0000813 | ESCRT I complex                                                   | 0.014684033 | GO:0005789 | endoplasmic reticulum membrane                          | 0.000111659 |

**Table S6.** KEGG enrichment the selected genes in BLM mink and SM mink.

| BLM       |                                                      |             | SM        |                                                                         |             |
|-----------|------------------------------------------------------|-------------|-----------|-------------------------------------------------------------------------|-------------|
| PathwayID | Pathway                                              | Pvalue      | PathwayID | Pathway                                                                 | Pvalue      |
| ko00030   | pentose phosphate pathway                            | 0.094600521 | ko04912   | GnRH signaling pathway                                                  | 0.128927223 |
| ko00591   | Linoleic acid metabolism                             | 0.0881447   | ko04211   | Longevity regulating pathway                                            | 0.121923851 |
| ko04950   | Maturity onset diabetes of the young                 | 0.084899894 | ko04012   | ErbB signaling pathway                                                  | 0.108222608 |
| ko04910   | Insulin signaling pathway                            | 0.077354749 | ko03320   | PPAR signaling pathway                                                  | 0.094978685 |
| ko04371   | Apelin signaling pathway                             | 0.072287196 | ko04530   | Tight junction                                                          | 0.092417211 |
| ko00790   | Folate biosynthesis                                  | 0.071807136 | ko04920   | Adipocytokine signaling pathway                                         | 0.086434768 |
| ko04270   | Vascular smooth muscle contraction                   | 0.068315842 | ko04115   | p53 signaling pathway                                                   | 0.082255834 |
| ko04611   | Platelet activation                                  | 0.064421047 | ko05206   | MicroRNAs in cancer                                                     | 0.06792953  |
| ko00730   | Thiamine metabolism                                  | 0.048451688 | ko04014   | Ras signaling pathway                                                   | 0.066144013 |
| ko04070   | Phosphatidylinositol signaling system                | 0.043660546 | ko02010   | ABC transporters                                                        | 0.038014768 |
| ko04922   | Glucagon signaling pathway                           | 0.042826513 | ko00270   | Cysteine and methionine metabolism                                      | 0.036450049 |
| ko00562   | Inositol phosphate metabolism                        | 0.026125144 | ko00600   | Sphingolipid metabolism                                                 | 0.034911119 |
| ko04360   | Axon guidance                                        | 0.020218231 | ko04624   | Toll and Imd signaling pathway                                          | 0.029022037 |
| ko00524   | Neomycin, kanamycin and gentamicin biosynthesis      | 0.01757549  | ko04310   | Wnt signaling pathway                                                   | 0.015687076 |
| ko04930   | Type II diabetes mellitus                            | 0.011991785 | ko04918   | Thyroid hormone synthesis                                               | 0.010655342 |
| ko04926   | Relaxin signaling pathway                            | 0.009375588 | ko04062   | Chemokine signaling pathway                                             | 0.006369985 |
| ko04340   | Hedgehog signaling pathway                           | 0.008369162 | ko04931   | Insulin resistance                                                      | 0.005710419 |
|           | alpha-Linolenic acid metabolism                      |             |           | Fc gamma R-mediated phagocytosis                                        |             |
|           | AGE-RAGE signaling pathway in diabetic complications |             |           | MAPK signaling pathway – fly                                            |             |
|           | Hedgehog signaling pathway – fly                     |             |           | Glycosaminoglycan biosynthesis – chondroitin sulfate / dermatan sulfate |             |
